# Supplementary material for: Natural leaves-assisted synthesis of nitrogen-doped, carbon-rich nanodots-sensitized, Ag-loaded anatase TiO2 square nanosheets with dominant {001} facets and their enhanced catalytic applications
Source: Royal Society of Chemistry journal article supplement (doi:10.1039/c3ta13248j), 2013-01-01
Supplement: c3ta13248j.pdf [file c3ta13248j.pdf]

# Natural Leaves-Assisted Synthesis of Nitrogen-Doped, Carbon-Rich Nanodots-Sensitized, Ag-Loaded Anatase TiO<sub>2</sub> Square Nanosheets with Dominant {001} Facets and Their Enhanced Catalytic Applications

Zhifeng Jiang, Xiaomeng Lv, Deli Jiang, Jimin Xie\*, Danjun Mao

School of Chemistry and Chemical Engineering, Jiangsu University, Zhenjiang, 212013, P. R.  
China

\*Corresponding author: Jimin Xie

Tel.: +86 11 88791708; fax: +86 11 88791800;

E-mail address: xiejm391@sohu.com

## Supporting Information

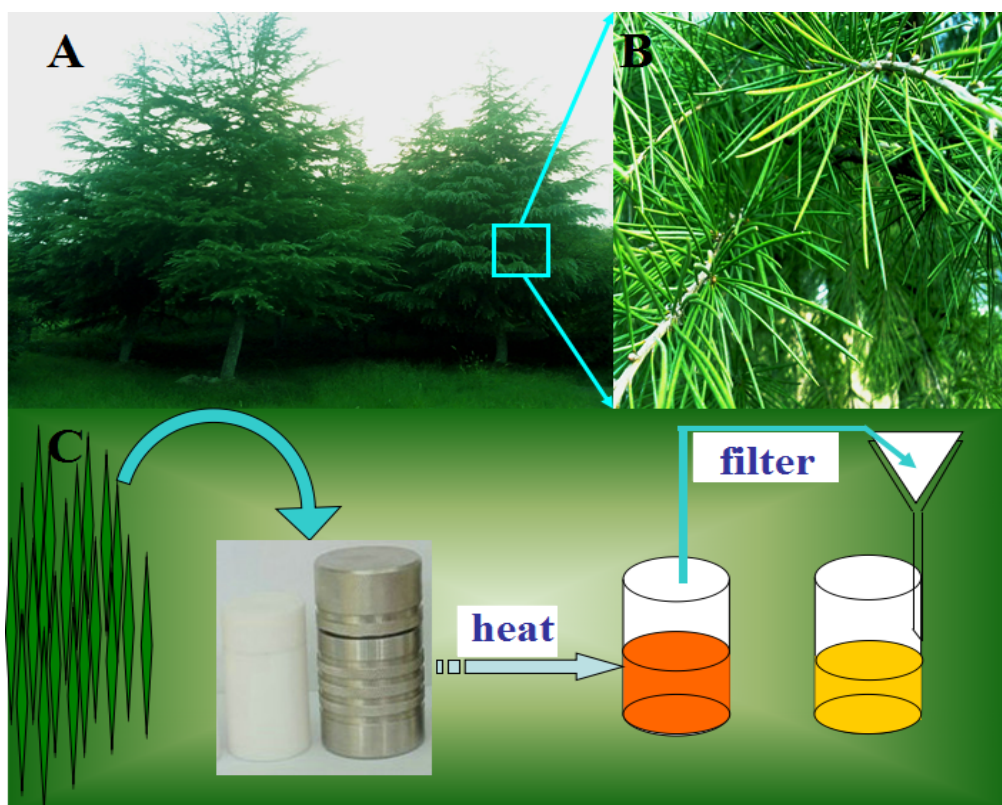

**Figure S1.** The details of preparation process (A and B are pictures of the leaves.).

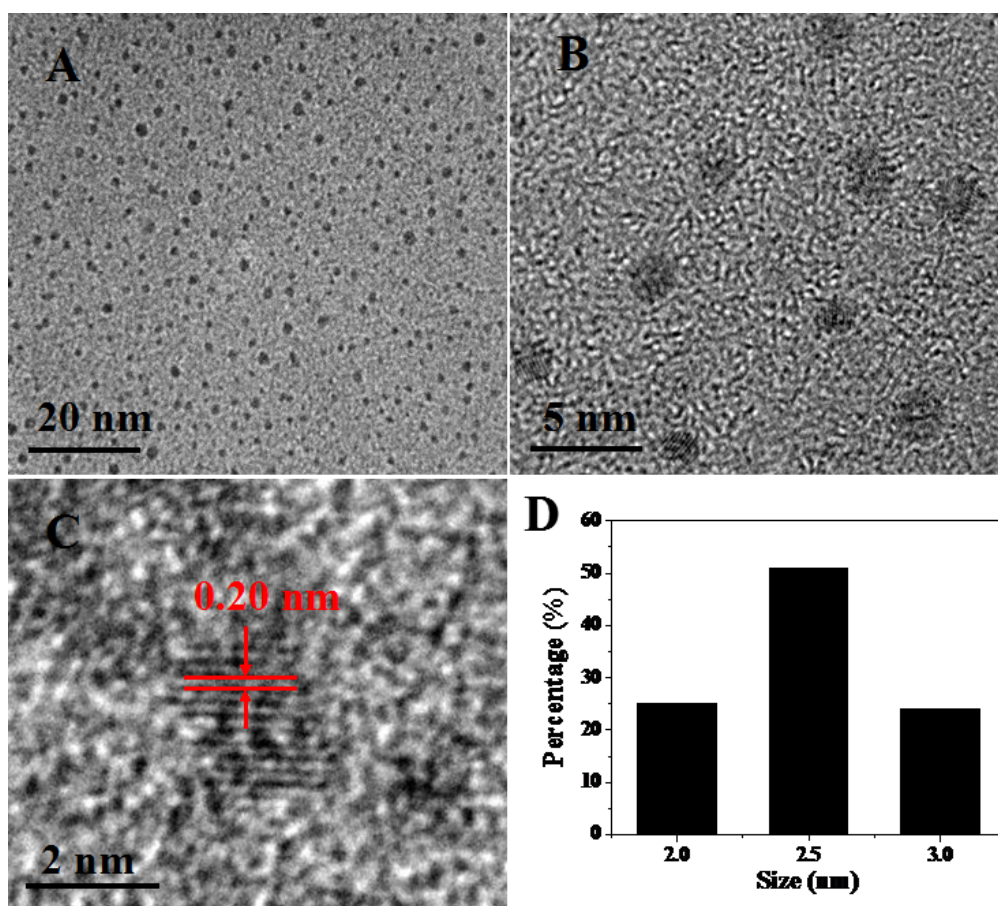

**Figure S2.** Low (A) and high (B) magnification TEM images of nanodots, (C) HRTEM image of one nanodot, (D) particle size distribution of nanodots.

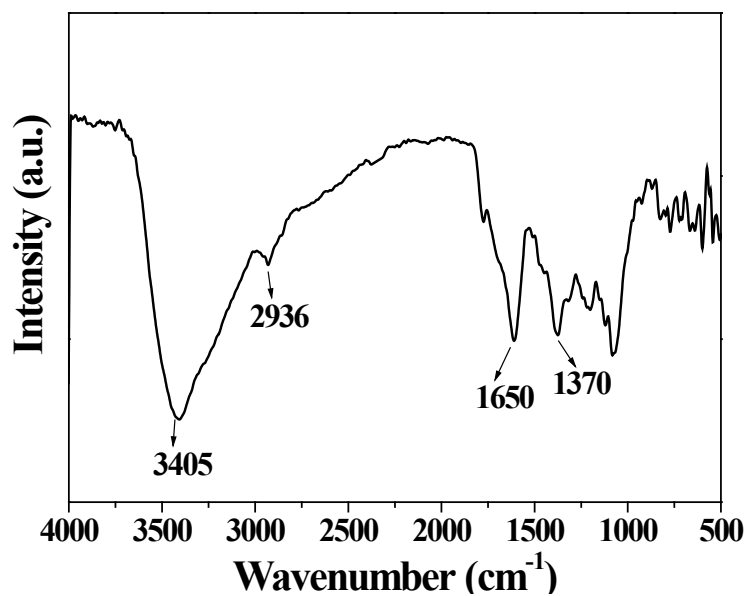

**Figure S3.** FT-IR spectrum of nanodots.

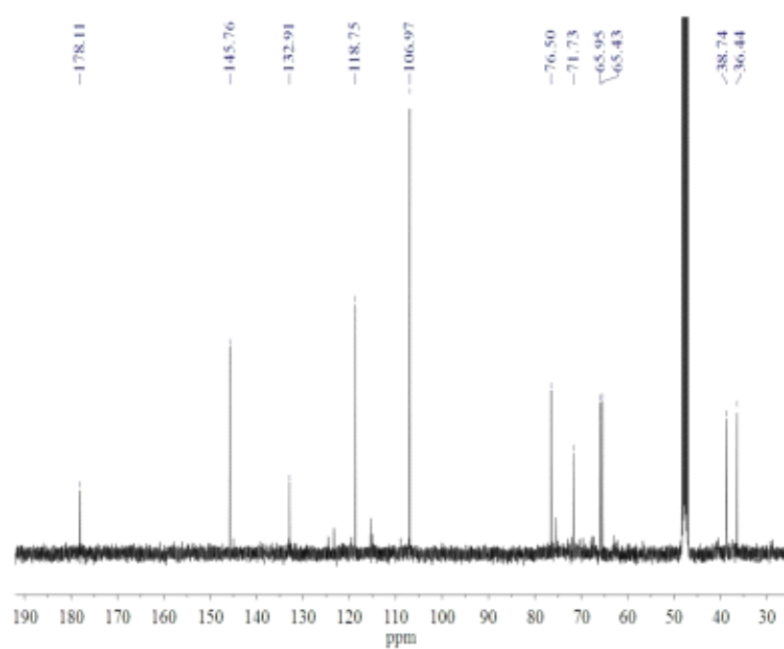

Figure S4.  $^{13}\text{C}$  NMR spectrum of the nanodots.

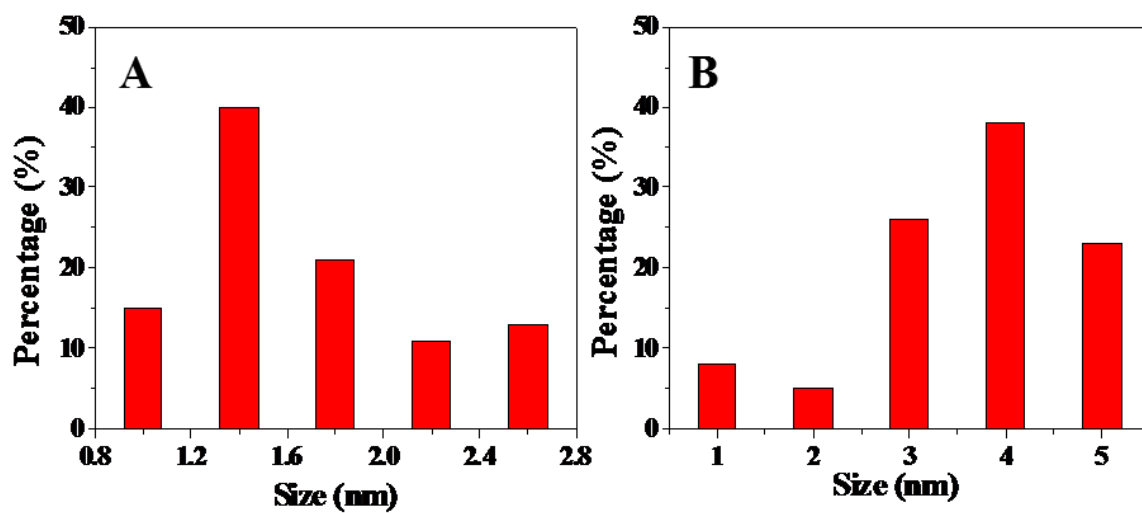

Figure S5. Size distribution of Ag (A: 2%Ag@NC-TiO<sub>2</sub>, B: 5%Ag@NC-TiO<sub>2</sub>).

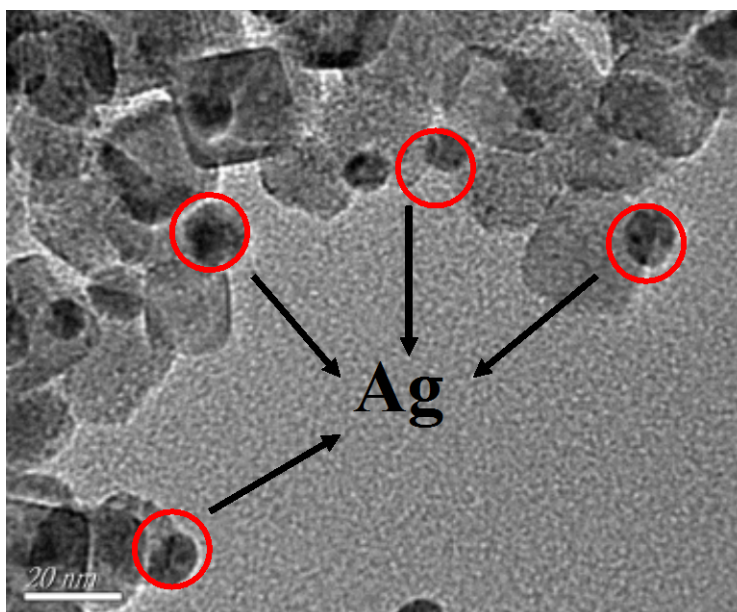

Figure S6. TEM image of 10%Ag@NC-TiO<sub>2</sub>.

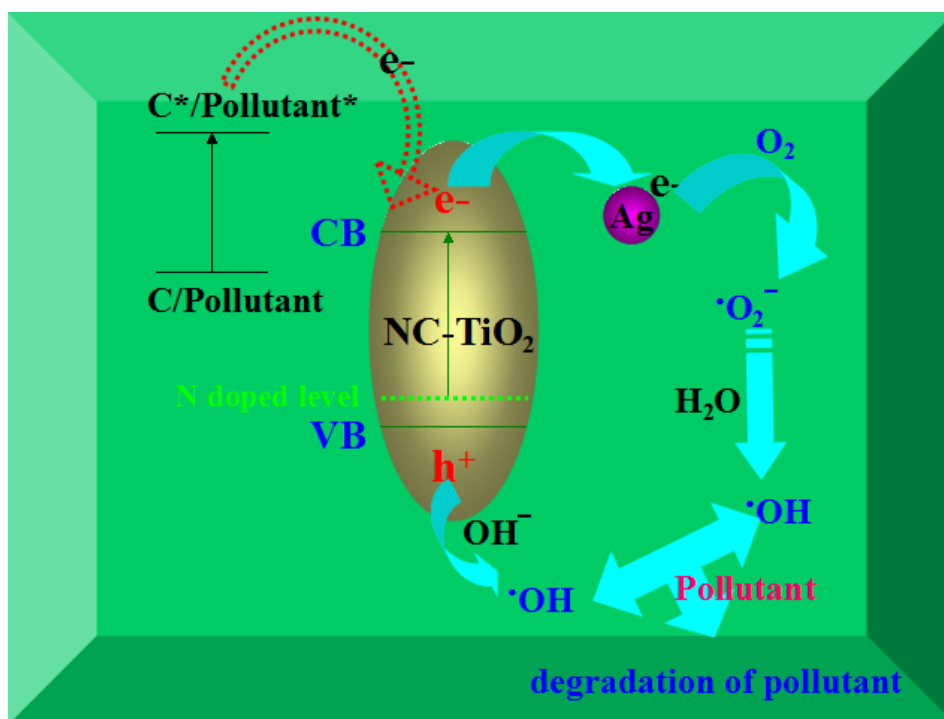

Figure S7. Possible mechanism of Ag@NC-TiO<sub>2</sub> nanosheets in degradation of rhodamine B and ciprofloxacin.
